# Supplementary figures and images for: AFF4 binding to Tat-P-TEFb indirectly stimulates TAR recognition of super elongation complexes at the HIV promoter
Source: eLife journal article supplement (doi:10.7554/elife.02375), 2014-04-24

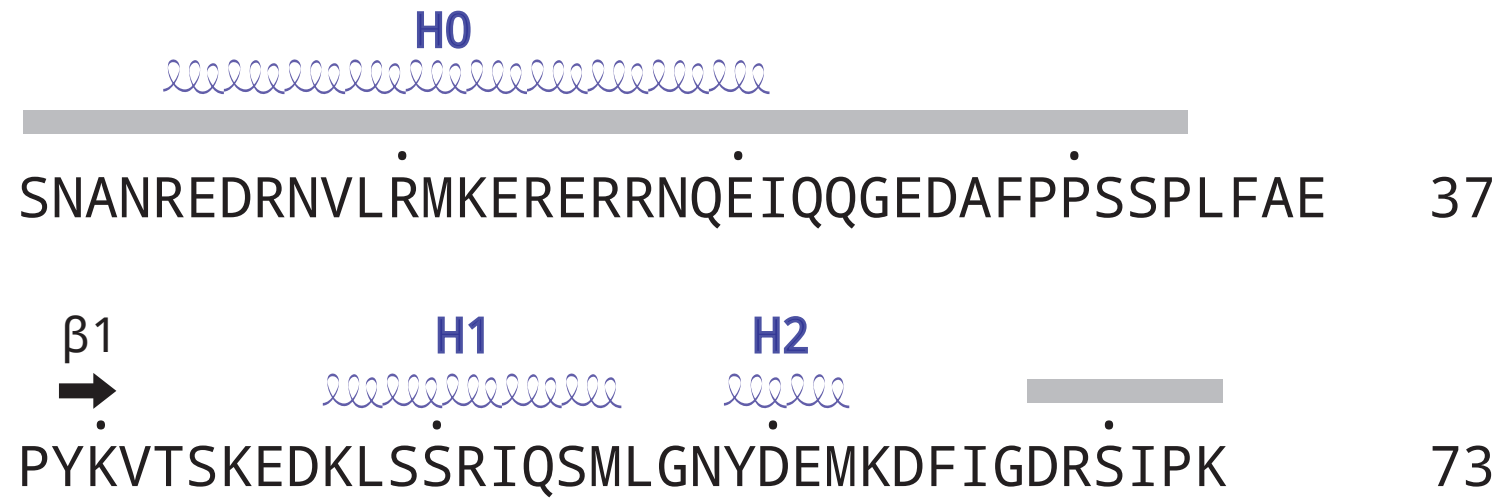

Supplement: supp [file elife_poa_e02375_Figure_1_figure_supplement_3.pdf › elife_poa_e02375_Figure_1_figure_supplement_3.pdf]
